# Supplementary material for: In Silico Identification and Evaluation of Natural Products as Potential Tumor Necrosis Factor Function Inhibitors Using Advanced Enalos Asclepios KNIME Nodes
Source: MDPI journal article supplement (doi:10.3390/ijms221910220), 2021-09-23
Supplement: s1 [file s1]

*Supplementary*

# **In Silico Identification and Evaluation of Natural Products as Potential Tumor Necrosis Factor Function Inhibitors Using Advanced Enalos Asclepios KNIME Nodes**

**Dimitra Papadopoulou <sup>1,2</sup>, Antonios Drakopoulos <sup>3</sup>, Panagiotis Lagarias <sup>3</sup>, Georgia Melagraki <sup>4</sup>, George Kollias <sup>1,2,5,6,\*</sup> and Antreas Afantitis <sup>3,\*</sup>**

<sup>1</sup> Biomedical Sciences Research Center "Alexander Fleming", Institute for Bioinnovation, 16672 Vari, Greece; papadopoulou@fleming.gr

<sup>2</sup> Department of Physiology, Medical School, National and Kapodistrian University of Athens, 11527 Athens, Greece

<sup>3</sup> NovaMechanics Ltd., Nicosia 1070, Cyprus; drakopoulos@novamechanics.com (A.D.); lagarias@novamechanics.com (P.L.)

<sup>4</sup> Division of Physical Sciences and Applications, Hellenic Military Academy, 16673 Vari, Greece; georgiamelagraki@gmail.com

<sup>5</sup> Center of New Biotechnologies & Precision Medicine, National and Kapodistrian University of Athens Medical School, 11527 Athens, Greece

<sup>6</sup> Joint Rheumatology Program, National and Kapodistrian University of Athens Medical School, 11527 Athens, Greece

\* Correspondence: kollias@fleming.gr (G.K.); afantitis@novamechanics.com (A.A.)

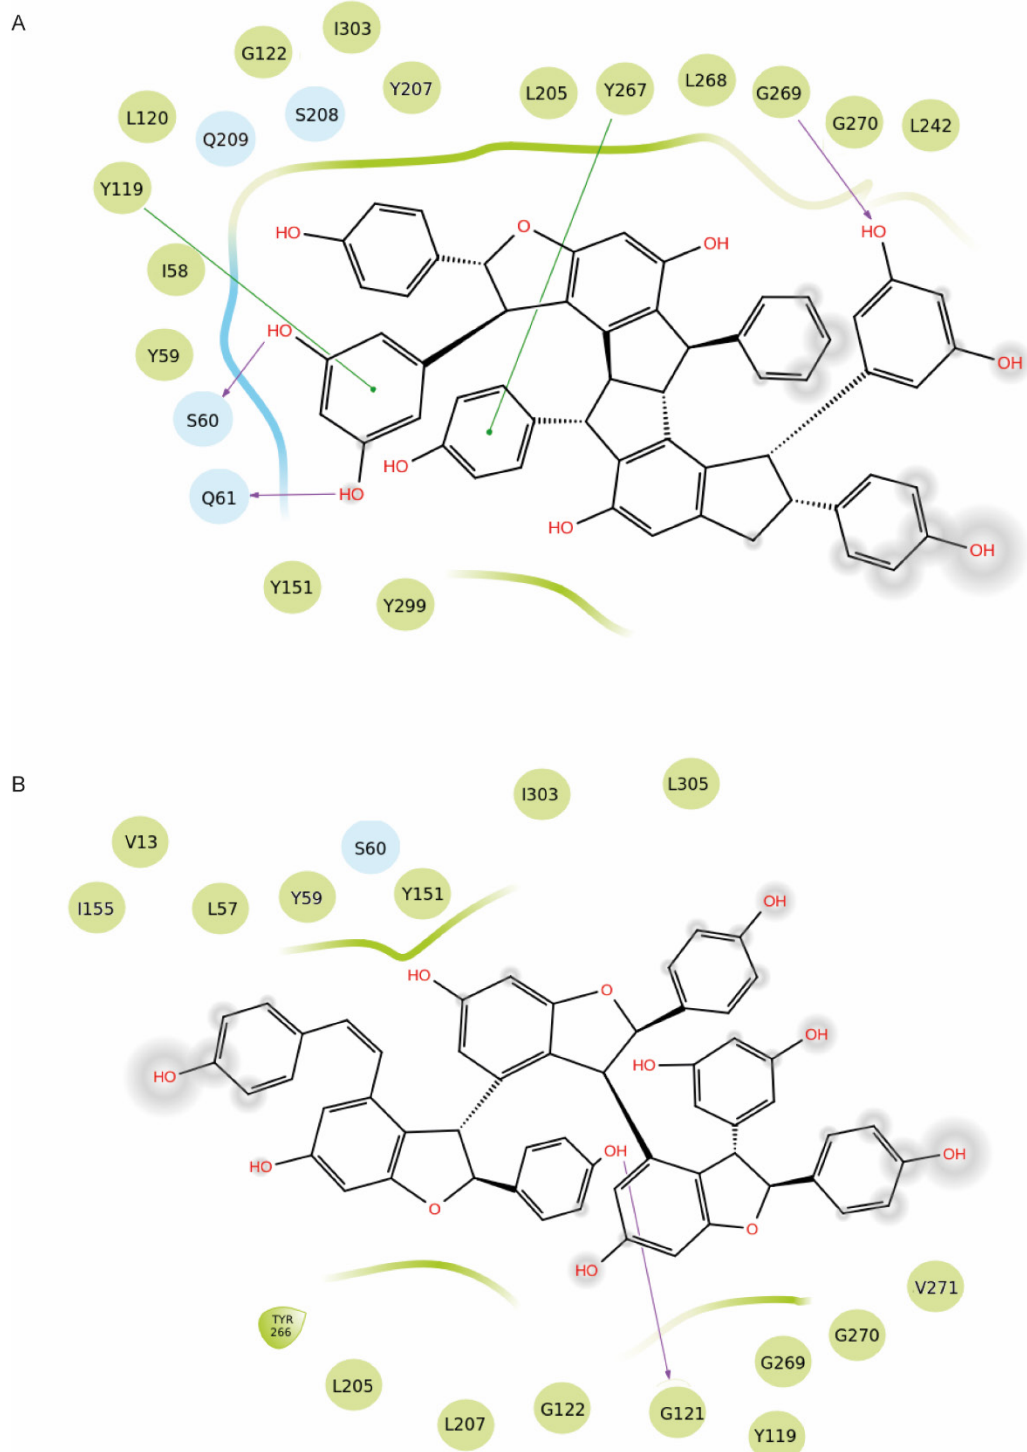

Supplementary Figure S1. SAR in 2D A. Nepalensinol B, B. Miyabenol A.

A

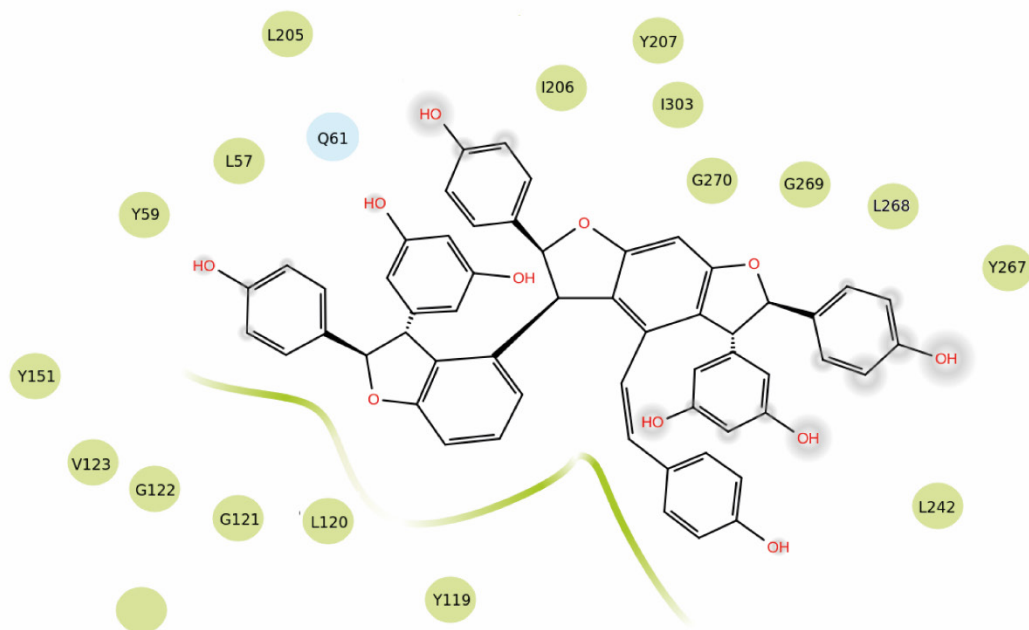

B

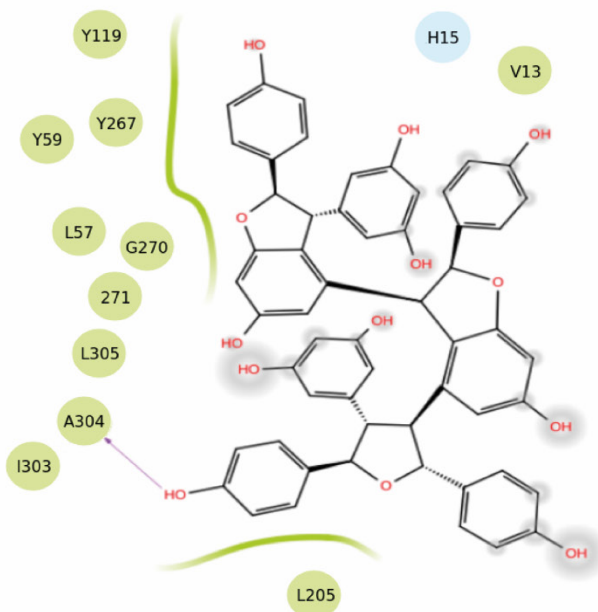

Supplementary Figure S2. SAR in 2D A. Flexuosol A, B. Kobophenol A

| <b><u>Ligands Name</u></b> | <b><u>Docking Scoore (rDock)</u></b> |
|----------------------------|--------------------------------------|
| Ampelopsin H               | -45.14                               |
| SPD304                     | -54.269                              |
| Nepalensinol B             | -35.722                              |
| Miyabenol A                | -23.104                              |
| Flexuosol A                | -32.603                              |
| Kobophenol A               | -43.617                              |
| Vitisin B                  | -37.549                              |
| trans-Diptoindonesin B     | -44.674                              |

Supplementary Figure S3. Docking scores of compounds
